# Supplementary material for: Mn4+doped (NH4)2TiF6and (NH4)2SiF6micro-crystal phosphors: synthesis through ion exchange at room temperature and their photoluminescence properties
Source: Royal Society of Chemistry journal article supplement (doi:10.1039/c6ra16417j), 2016-01-01
Supplement: c6ra16417j1.pdf [file c6ra16417j1.pdf]

**Mn<sup>4+</sup> doped (NH<sub>4</sub>)<sub>2</sub>TiF<sub>6</sub> and (NH<sub>4</sub>)<sub>2</sub>SiF<sub>6</sub> micro-crystal phosphors:  
synthesis through ion exchange at room temperature and their  
photoluminescence properties**

Luqing Xi<sup>1</sup>, Yuexiao Pan<sup>1\*</sup>, Shaoming Huang<sup>1</sup>, Guokui Liu<sup>2\*</sup>

<sup>1</sup>Key Laboratory of Carbon Materials of Zhejiang Province, College of Chemistry  
and Materials Engineering, Wenzhou University, Wenzhou 325035, P.R. China.

E-mail: yxpan8@gmail.com, Fax&Tel: +86-577-8837-3017

<sup>2</sup>Chemical Sciences and Engineering Division, Argonne National Laboratory,  
Argonne, IL 60439, USA. Fax: 630-252-4225; Tel: 630-252-4630. E-mail:  
gkliu@anl.gov

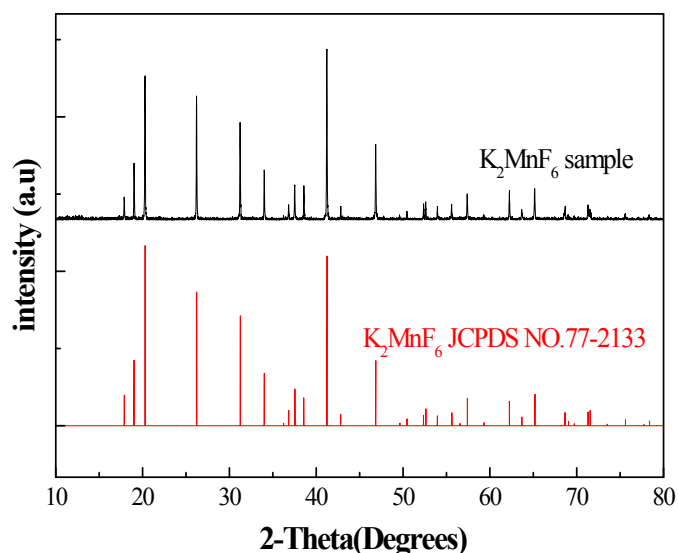

**Figure S1.** XRD pattern of as-prepared K<sub>2</sub>MnF<sub>6</sub>.

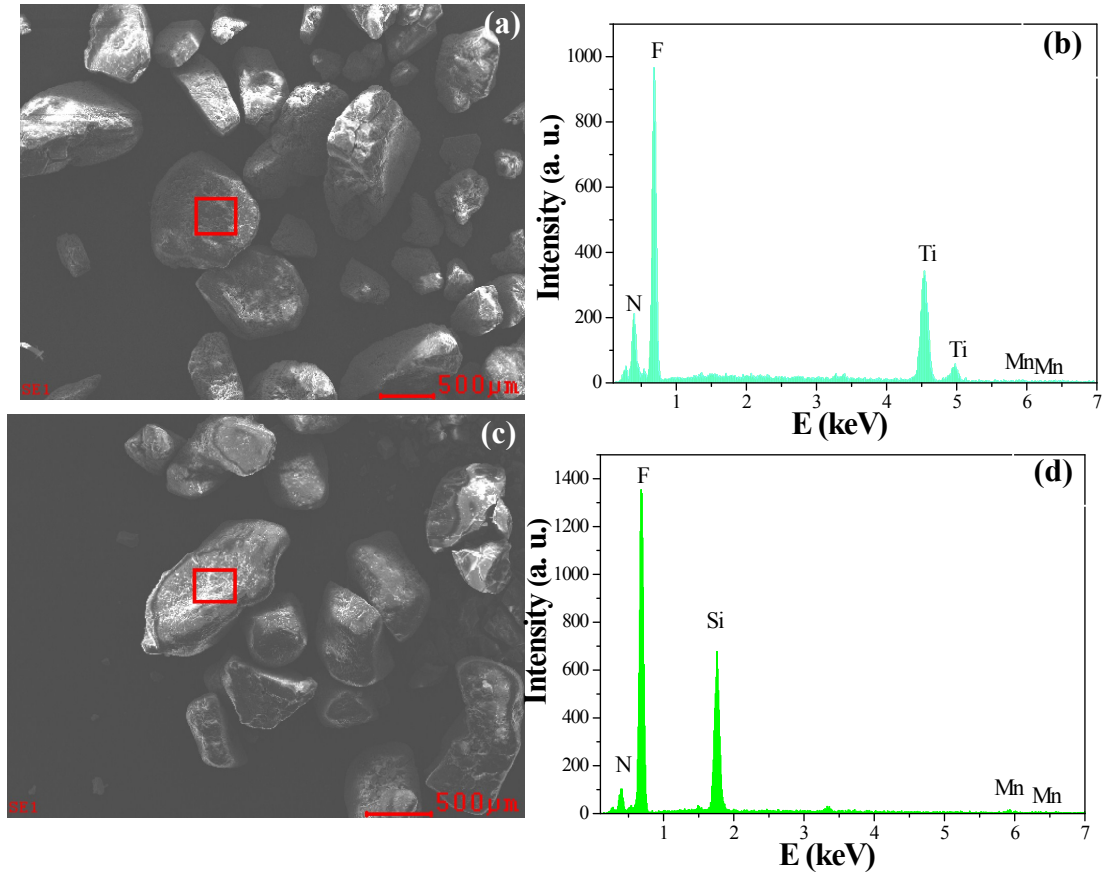

**Figure S2.** SEM images and EDS spectra of red crystals (a,b) NTF:Mn and (c,d) NSF:Mn prepared at room temperature.

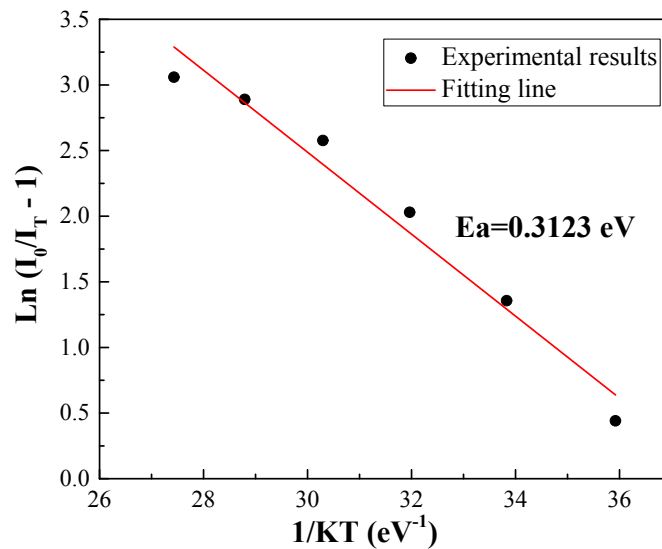

**Figure S3.** Arrhenius fitting of the emission intensity of the phosphor NTF:Mn decreased with temperature increasing.

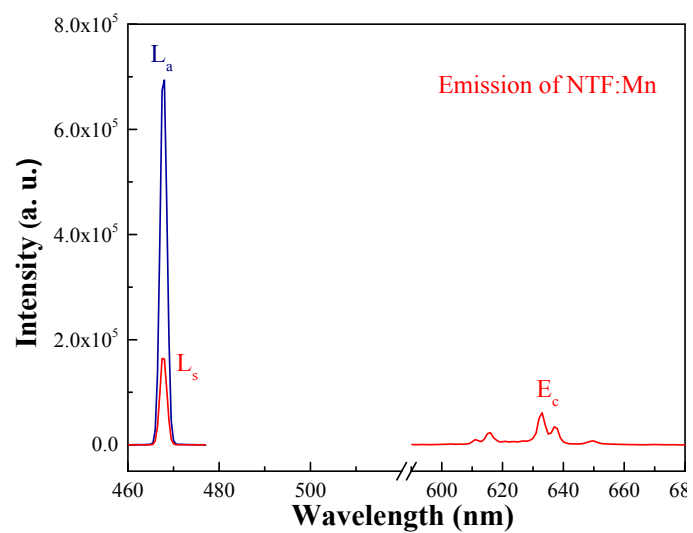

**Figure S4.** The excitation lines and emission spectrum of NSF:Mn measured using an integrating sphere.

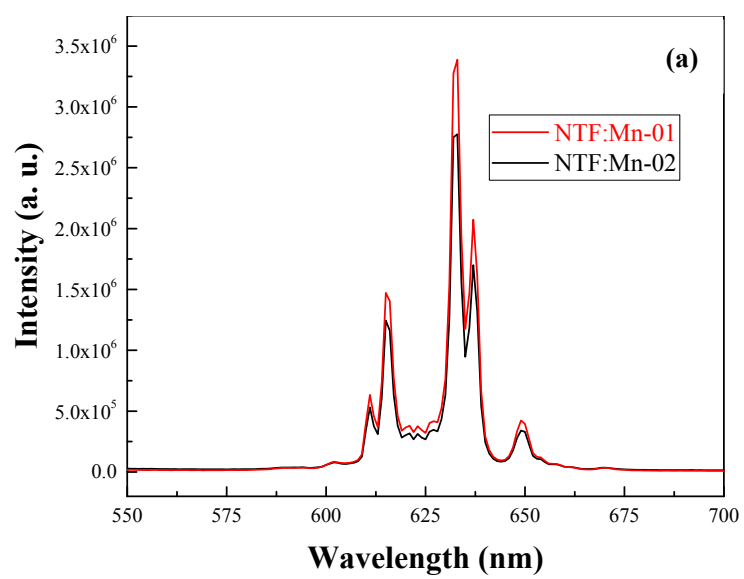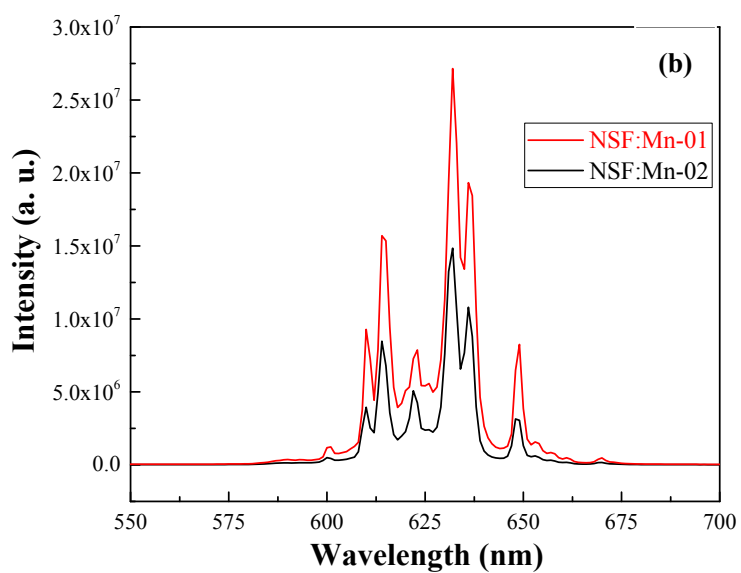

**Figure S5.** The emission spectra of phosphors (a) NTF:Mn and (b) NSF:Mn obtained by two methods.
